# Supplementary material for: A Genetic Resource for Rice Improvement: Introgression Library of Agronomic Traits for All AA Genome Oryza Species
Source: Front Plant Sci. 2022 Mar 24;13:856514. doi: 10.3389/fpls.2022.856514 (PMC8992386; doi:10.3389/fpls.2022.856514)
Supplement: Supplementary file 1 [file Table_1.xlsx]

## Sheet: Sheet1
	Accession ID	Species	Source	Origin of germplasm
1	IRGC 80575	O. nivara	IRRI Gene Bank	India
2	IRGC 80580	O. nivara	IRRI Gene Bank	India
3	IRGC 80581	O. nivara	IRRI Gene Bank	India
4	IRGC 80611	O. nivara	IRRI Gene Bank	India
5	IRGC 80625	O. nivara	IRRI Gene Bank	India
6	IRGC 80677	O. nivara	IRRI Gene Bank	India
7	IRGC 80681	O. nivara	IRRI Gene Bank	India
8	IRGC 80722	O. nivara	IRRI Gene Bank	Myanmar
9	IRGC 80724	O. nivara	IRRI Gene Bank	Myanmar
10	IRGC 81867	O. nivara	IRRI Gene Bank	India
11	IRGC 82005	O. nivara	IRRI Gene Bank	India
12	IRGC 82012	O. nivara	IRRI Gene Bank	India
13	IRGC 100195	O. nivara	IRRI Gene Bank	Myanmar
14	IRGC 100593	O. nivara	IRRI Gene Bank	ThaiIand
15	IRGC 101508	O. nivara	IRRI Gene Bank	India
16	IRGC 80453	O. nivara	IRRI Gene Bank	India
17	IRGC 80696	O. nivara	IRRI Gene Bank	India
18	IRGC 81855	O. nivara	IRRI Gene Bank	India
19	IRGC 102167	O. nivara	IRRI Gene Bank	India
20	GS NO.18255	O. nivara	IRRI Gene Bank	India
21	IRGC 80433	O. rufipogon	IRRI Gene Bank	India
22	IRGC 80680	O. rufipogon	IRRI Gene Bank	India
23	IRGC 81976	O. rufipogon	IRRI Gene Bank	Indonesia
24	IRGC 81984	O. rufipogon	IRRI Gene Bank	Laos
25	IRGC 81986	O. rufipogon	IRRI Gene Bank	Cambodia
26	IRGC 81994	O. rufipogon	IRRI Gene Bank	Papua New Guinea
27	IRGC 82011	O. rufipogon	IRRI Gene Bank	India
28	IRGC 100639	O. rufipogon	IRRI Gene Bank	Taiwan
29	IRGC 103308	O. rufipogon	IRRI Gene Bank	Taiwan
30	IRGC 103884	O. rufipogon	IRRI Gene Bank	ThaiIand
31	IRGC 105832	O. rufipogon	IRRI Gene Bank	ThaiIand
32	IRGC 106133	O. rufipogon	IRRI Gene Bank	India
33	IRGC 106138	O. rufipogon	IRRI Gene Bank	India
34	IRGC 106340	O. rufipogon	IRRI Gene Bank	Myanmar
35	IRGC 80570	O. rufipogon	IRRI Gene Bank	India
36	IRGC 102159	O. rufipogon	IRRI Gene Bank	ThaiIand
37	PCR9607	O. rufipogon	IRRI Gene Bank	ThaiIand
38	Dongxiang common wild rice	O. rufipogon	YAAS Gene Bank	China
39	Yuanjiang common wild rice	O. rufipogon	YAAS Gene Bank	China
40	IRGC 101145	O. meridionalis	IRRI Gene Bank	Australia
41	IRGC 101147	O. meridionalis	IRRI Gene Bank	Australia
42	IRGC 103322	O. meridionalis	IRRI Gene Bank	Australia
43	IRGC 104085	O. meridionalis	IRRI Gene Bank	Australia
44	IRGC 104498	O. meridionalis	IRRI Gene Bank	Australia
45	IRGC 105279	O. meridionalis	IRRI Gene Bank	Australia
46	IRGC 105298	O. meridionalis	IRRI Gene Bank	Australia
47	IRGC 82031	O. meridionalis	IRRI Gene Bank	Australia
48	IRGC 82032	O. glumaepatula	IRRI Gene Bank	BraziI
49	IRGC 100184	O. glumaepatula	IRRI Gene Bank	BraziI
50	IRGC 101960	O. glumaepatula	IRRI Gene Bank	BraziI
51	IRGC 104386	O. glumaepatula	IRRI Gene Bank	VenezuaIe
52	IRGC 105661	O. glumaepatula	IRRI Gene Bank	BraziI
53	IRGC 105662	O. glumaepatula	IRRI Gene Bank	BraziI
54	IRGC 100117	O. barthii	IRRI Gene Bank	Guinea
55	IRGC 100936	O. barthii	IRRI Gene Bank	Niger
56	IRGC 101051	O. barthii	IRRI Gene Bank	Africa
57	IRGC 101196	O. barthii	IRRI Gene Bank	Cameroom
58	IRGC 103895	O. barthii	IRRI Gene Bank	Senegal
59	IRGC 104061	O. barthii	IRRI Gene Bank	Niger
60	IRGC 104284	O. barthii	IRRI Gene Bank	Mali
61	IRGC 104613	O. barthii	IRRI Gene Bank	Guinea
62	IRGC 101255	O. barthii	IRRI Gene Bank	Cameroom
63	IRGC 104103	O. barthii	IRRI Gene Bank	Chad
64	IRGC 104138	O. barthii	IRRI Gene Bank	Cameroom
65	IRGC 105507	O. barthii	IRRI Gene Bank	Mali
66	IRGC 105987	O. barthii	IRRI Gene Bank	Cameroom
67	No.5496	O. longistaminata	YAAS Gene Bank
68	IRGC 100127	O. glaberrima	IRRI Gene Bank
69	IRGC 100140	O. glaberrima	IRRI Gene Bank
70	IRGC 100149	O. glaberrima	IRRI Gene Bank
71	IRGC 100156	O. glaberrima	IRRI Gene Bank
72	IRGC 100160-1	O. glaberrima	IRRI Gene Bank
73	IRGC 100160-2	O. glaberrima	IRRI Gene Bank
74	IRGC 101838	O. glaberrima	IRRI Gene Bank
75	IRGC 101842	O. glaberrima	IRRI Gene Bank
76	IRGC 101854	O. glaberrima	IRRI Gene Bank
77	IRGC 101856	O. glaberrima	IRRI Gene Bank
78	IRGC 101898	O. glaberrima	IRRI Gene Bank	Nigeria
79	IRGC 101901	O. glaberrima	IRRI Gene Bank	Nigeria
80	IRGC 102046	O. glaberrima	IRRI Gene Bank	Mali
81	IRGC 102244	O. glaberrima	IRRI Gene Bank	Liberia
82	IRGC 102254	O. glaberrima	IRRI Gene Bank	Liberia
83	IRGC 102295	O. glaberrima	IRRI Gene Bank	Liberia
84	IRGC 102304	O. glaberrima	IRRI Gene Bank	Liberia
85	IRGC 102305	O. glaberrima	IRRI Gene Bank	Liberia
86	IRGC 102310	O. glaberrima	IRRI Gene Bank	Liberia
87	IRGC 102316	O. glaberrima	IRRI Gene Bank	Liberia
88	IRGC 102338	O. glaberrima	IRRI Gene Bank	Liberia
89	IRGC 102370	O. glaberrima	IRRI Gene Bank	Liberia
90	IRGC 102375	O. glaberrima	IRRI Gene Bank	Liberia
91	IRGC 102482	O. glaberrima	IRRI Gene Bank	Liberia
92	IRGC 102509	O. glaberrima	IRRI Gene Bank	Liberia
93	IRGC 102513	O. glaberrima	IRRI Gene Bank	Liberia
94	IRGC 102540	O. glaberrima	IRRI Gene Bank	Liberia
95	IRGC 102555	O. glaberrima	IRRI Gene Bank	Liberia
96	IRGC 102556	O. glaberrima	IRRI Gene Bank	Liberia
97	IRGC 102583	O. glaberrima	IRRI Gene Bank	Liberia
98	IRGC 102601	O. glaberrima	IRRI Gene Bank	Liberia
99	IRGC 102614	O. glaberrima	IRRI Gene Bank	Liberia
100	IRGC 102671	O. glaberrima	IRRI Gene Bank	Liberia
101	IRGC 102692	O. glaberrima	IRRI Gene Bank	Liberia
102	IRGC 102718	O. glaberrima	IRRI Gene Bank	Senegal
103	IRGC 102720	O. glaberrima	IRRI Gene Bank	Senegal
104	IRGC 102724	O. glaberrima	IRRI Gene Bank	Senegal
105	IRGC 102726	O. glaberrima	IRRI Gene Bank	Senegal
106	IRGC 102846	O. glaberrima	IRRI Gene Bank	Sikasso,Mali
107	IRGC 102864	O. glaberrima	IRRI Gene Bank	Sikasso,Mali
108	IRGC 102928	O. glaberrima	IRRI Gene Bank	Sikasso,Mali
109	IRGC 102933	O. glaberrima	IRRI Gene Bank
110	IRGC 102939	O. glaberrima	IRRI Gene Bank
111	IRGC 102949	O. glaberrima	IRRI Gene Bank	Mopti,Mali
112	IRGC 102950	O. glaberrima	IRRI Gene Bank	Mopti,Mali
113	IRGC 102986	O. glaberrima	IRRI Gene Bank	Mopti,Mali
114	IRGC 103143	O. glaberrima	IRRI Gene Bank	Mopti,Mali
115	IRGC 103144	O. glaberrima	IRRI Gene Bank	Mopti,Mali
116	IRGC 103145	O. glaberrima	IRRI Gene Bank	Mopti,Mali
117	IRGC 103146	O. glaberrima	IRRI Gene Bank	Mopti,Mali
118	IRGC 103147	O. glaberrima	IRRI Gene Bank	Mopti,Mali
119	IRGC 103232	O. glaberrima	IRRI Gene Bank	Senegal
120	IRGC 103450	O. glaberrima	IRRI Gene Bank	Gambia
121	IRGC 103466	O. glaberrima	IRRI Gene Bank	Burkina Faso
122	IRGC 103469	O. glaberrima	IRRI Gene Bank	Burkina Faso
123	IRGC 103470	O. glaberrima	IRRI Gene Bank	Burkina Faso
124	IRGC 103475	O. glaberrima	IRRI Gene Bank	Côte D'Ivoire
125	IRGC 103479	O. glaberrima	IRRI Gene Bank	Côte D'Ivoire
126	IRGC 103481	O. glaberrima	IRRI Gene Bank	Côte D'Ivoire
127	IRGC 103482	O. glaberrima	IRRI Gene Bank	Côte D'Ivoire
128	IRGC 103483	O. glaberrima	IRRI Gene Bank	Côte D'Ivoire
129	IRGC 103485	O. glaberrima	IRRI Gene Bank	Côte D'Ivoire
130	IRGC 103502	O. glaberrima	IRRI Gene Bank	Koulikoro, Mali
131	IRGC 103503	O. glaberrima	IRRI Gene Bank	Koulikoro, Mali
132	IRGC 103530	O. glaberrima	IRRI Gene Bank
133	IRGC 103604	O. glaberrima	IRRI Gene Bank
134	IRGC 103612	O. glaberrima	IRRI Gene Bank
135	IRGC 103651	O. glaberrima	IRRI Gene Bank
136	IRGC 103930	O. glaberrima	IRRI Gene Bank	Nigeria
137	IRGC 103944	O. glaberrima	IRRI Gene Bank	Liberia
138	IRGC 103956	O. glaberrima	IRRI Gene Bank	Senegal
139	IRGC 103958	O. glaberrima	IRRI Gene Bank	Senegal
140	IRGC 103970	O. glaberrima	IRRI Gene Bank	Nigeria
141	IRGC 103973	O. glaberrima	IRRI Gene Bank	Nigeria
142	IRGC 103976	O. glaberrima	IRRI Gene Bank	Nigeria
143	IRGC 103977	O. glaberrima	IRRI Gene Bank	Nigeria
144	IRGC 103983	O. glaberrima	IRRI Gene Bank	Nigeria
145	IRGC 103984	O. glaberrima	IRRI Gene Bank	Nigeria
146	IRGC 103996	O. glaberrima	IRRI Gene Bank	Nigeria
147	IRGC 103998	O. glaberrima	IRRI Gene Bank	Nigeria
148	IRGC 104000	O. glaberrima	IRRI Gene Bank	Nigeria
149	IRGC 104005	O. glaberrima	IRRI Gene Bank	Nigeria
150	IRGC 104021	O. glaberrima	IRRI Gene Bank	Cacheu, Guinea-Bissau
151	IRGC 104023	O. glaberrima	IRRI Gene Bank	Guinea-Bissau
152	IRGC 104024	O. glaberrima	IRRI Gene Bank	Guinea-Bissau
153	IRGC 104025	O. glaberrima	IRRI Gene Bank	Guinea-Bissau
154	IRGC 104026	O. glaberrima	IRRI Gene Bank	Bafatá, Guinea-Bissau
155	IRGC 104027	O. glaberrima	IRRI Gene Bank	Bafatá, Guinea-Bissau
156	IRGC 104032	O. glaberrima	IRRI Gene Bank	Tombali, Guinea-Bissau
157	IRGC 104038	O. glaberrima	IRRI Gene Bank	Senegal
158	IRGC 104039	O. glaberrima	IRRI Gene Bank	Chad
159	IRGC 104045	O. glaberrima	IRRI Gene Bank	Chad
160	IRGC 104049	O. glaberrima	IRRI Gene Bank	Cameroon
161	IRGC 104050	O. glaberrima	IRRI Gene Bank	Cameroon
162	IRGC 104158	O. glaberrima	IRRI Gene Bank	Guinea
163	IRGC 104162	O. glaberrima	IRRI Gene Bank	Guinea
164	IRGC 104163	O. glaberrima	IRRI Gene Bank	Guinea
165	IRGC 104339	O. glaberrima	IRRI Gene Bank	Guinea
166	IRGC 104586	O. glaberrima	IRRI Gene Bank	Cameroon
167	IRGC 102528	O. glaberrima	IRRI Gene Bank	Liberia
168	IRGC 102627	O. glaberrima	IRRI Gene Bank	Liberia
169	CG14	O. glaberrima	WARDA
170	CG17	O. glaberrima	WARDA
171	ITA325	upland rice	IITA
172	IR55423-01	upland rice	IRRI Gene Bank
173	IR60080-46A	upland rice	IRRI Gene Bank
174	IR65907-206-7-B	upland rice	IRRI Gene Bank
175	WAB56-50	upland rice	WARDA
176	WAB450-16	upland rice	WARDA
177	Dourado Precoce	upland rice	YAAS Gene Bank	Brazil
178	IAC1246	upland rice	YAAS Gene Bank	Brazil
179	IAC165	upland rice	YAAS Gene Bank	Brazil
180	IAC25	upland rice	YAAS Gene Bank	Brazil
181	Maravilha	upland rice	YAAS Gene Bank	Brazil
182	63-83	upland rice	YAAS Gene Bank	West Africa
183	Moroberekan	upland rice	YAAS Gene Bank	West Africa
184	OS6	upland rice	YAAS Gene Bank	West Africa
185	IRAT13	upland rice	YAAS Gene Bank	France
186	IRAT104	upland rice	YAAS Gene Bank	France
187	IRAT216	upland rice	YAAS Gene Bank	France
188	CIRAD 411	upland rice	YAAS Gene Bank	France
189	AZUCENA	upland rice	YAAS Gene Bank	Philippines
190	UPL RI-5	upland rice	YAAS Gene Bank	Philippines
191	BR21	upland rice	YAAS Gene Bank	Bangladesh
192	Dular	upland rice	YAAS Gene Bank	India
193	Vandana	upland rice	YAAS Gene Bank	India
194	B6144F-MR-6	upland rice	YAAS Gene Bank	India
195	Yunlu 5	upland rice	YAAS Gene Bank	Kunming,China
196	Yunlu 11	upland rice	YAAS Gene Bank	Kunming,China
197	Yunlu 28	upland rice	YAAS Gene Bank	Kunming,China
198	Yunlu 29	upland rice	YAAS Gene Bank	Kunming,China
199	Yunlu 55	upland rice	YAAS Gene Bank	Kunming,China
200	Yunlu 56	upland rice	YAAS Gene Bank	Kunming,China
201	Yunlu 58	upland rice	YAAS Gene Bank	Kunming,China
202	Yunlu 59	upland rice	YAAS Gene Bank	Kunming,China
203	Yunlu 63	upland rice	YAAS Gene Bank	Kunming,China
204	Yunlu 64	upland rice	YAAS Gene Bank	Kunming,China
205	Yunlu 65	upland rice	YAAS Gene Bank	Kunming,China
206	Yunlu 68	upland rice	YAAS Gene Bank	Kunming,China
207	Yunlu 71	upland rice	YAAS Gene Bank	Kunming,China
208	Yunlu 77	upland rice	YAAS Gene Bank	Kunming,China
209	Yunlu 83	upland rice	YAAS Gene Bank	Kunming,China
210	Yunlu 87	upland rice	YAAS Gene Bank	Kunming,China
211	Yunlu 88	upland rice	YAAS Gene Bank	Kunming,China
212	Yunlu 89	upland rice	YAAS Gene Bank	Kunming,China
213	Yunlu 91	upland rice	YAAS Gene Bank	Kunming,China
214	Yunlu 92	upland rice	YAAS Gene Bank	Kunming,China
215	Yunlu 97	upland rice	YAAS Gene Bank	Kunming,China
216	Yunlu 98	upland rice	YAAS Gene Bank	Kunming,China
217	Yunlu 99	upland rice	YAAS Gene Bank	Kunming,China
218	Dahonggu	upland rice	YAAS Gene Bank	Gengma,China
219	Dahuigu	upland rice	YAAS Gene Bank	Gengma,China
220	Fengqingyingzuigu	upland rice	YAAS Gene Bank	Gengma,China
221	Hongxinnuo	upland rice	YAAS Gene Bank	Gengma,China
222	Kaoruliang	upland rice	YAAS Gene Bank	Gengma,China
223	Kaohanweng	upland rice	YAAS Gene Bank	Gengma,China
224	Xiaobaigu	upland rice	YAAS Gene Bank	Gengma,China
225	Xiaohonggu	upland rice	YAAS Gene Bank	Gengma,China
226	Digunuo	upland rice	YAAS Gene Bank	Honghe,China
227	Yaorengu	upland rice	YAAS Gene Bank	Honghe,China
228	Huangpigu	upland rice	YAAS Gene Bank	Jiangcheng, China
229	Kugu	upland rice	YAAS Gene Bank	Jiangcheng, China
230	Wulugu	upland rice	YAAS Gene Bank	Jiangcheng, China
231	Jiangchuanhangu	upland rice	YAAS Gene Bank	Jiangchuan,China
232	Huakenuo	upland rice	YAAS Gene Bank	Jianghe,China
233	Mengtigu	upland rice	YAAS Gene Bank	Jianghe,China
234	Mengwanggu	upland rice	YAAS Gene Bank	Jinghong, China
235	Aihonggu	upland rice	YAAS Gene Bank	Lancang,China
236	Annangu	upland rice	YAAS Gene Bank	Lancang,China
237	Bayuenuo	upland rice	YAAS Gene Bank	Lancang,China
238	Bailandi	upland rice	YAAS Gene Bank	Lancang,China
239	Baimalan	upland rice	YAAS Gene Bank	Lancang,China
240	Banliyihao	upland rice	YAAS Gene Bank	Lancang,China
241	Changmaogu	upland rice	YAAS Gene Bank	Lancang,China
242	Hangu	upland rice	YAAS Gene Bank	Lancang,China
243	Haohaozao	upland rice	YAAS Gene Bank	Lancang,China
244	Haomenglong	upland rice	YAAS Gene Bank	Lancang,China
245	Haopei	upland rice	YAAS Gene Bank	Lancang,China
246	Haotunan	upland rice	YAAS Gene Bank	Lancang,China
247	Huangpigu	upland rice	YAAS Gene Bank	Lancang,China
248	Lamujia	upland rice	YAAS Gene Bank	Lancang,China
249	Lancandabaigu	upland rice	YAAS Gene Bank	Lancang,China
250	Landigu	upland rice	YAAS Gene Bank	Lancang,China
251	Mazaogu	upland rice	YAAS Gene Bank	Lancang,China
252	Mazhagu	upland rice	YAAS Gene Bank	Lancang,China
253	Mowanggu	upland rice	YAAS Gene Bank	Lancang,China
254	Niushigu	upland rice	YAAS Gene Bank	Lancang,China
255	Sanlicun	upland rice	YAAS Gene Bank	Lancang,China
256	Shoudidabaigu	upland rice	YAAS Gene Bank	Lancang,China
257	wulugu	upland rice	YAAS Gene Bank	Lancang,China
258	Xiaobaigu	upland rice	YAAS Gene Bank	Lancang,China
259	Xiaogu	upland rice	YAAS Gene Bank	Lancang,China
260	Zhaxima	upland rice	YAAS Gene Bank	Lancang,China
261	Landigu	upland rice	YAAS Gene Bank	Longling, China
262	Lunanhangu	upland rice	YAAS Gene Bank	Lunan,China
263	Boyegu	upland rice	YAAS Gene Bank	Lvchun,China
264	Dabaigu	upland rice	YAAS Gene Bank	Lvchun,China
265	liandaogu	upland rice	YAAS Gene Bank	Lvchun,China
266	Beizigu	upland rice	YAAS Gene Bank	Menghai, China
267	Cangzugu	upland rice	YAAS Gene Bank	Menghai, China
268	Haodali	upland rice	YAAS Gene Bank	Menghai, China
269	Haomengnan	upland rice	YAAS Gene Bank	Menghai, China
270	Haonanwen	upland rice	YAAS Gene Bank	Menghai, China
271	Haonanda	upland rice	YAAS Gene Bank	Menghai, China
272	Haonuohe	upland rice	YAAS Gene Bank	Menghai, China
273	Honghangu	upland rice	YAAS Gene Bank	Menghai, China
274	Hongnuogu	upland rice	YAAS Gene Bank	Menghai, China
275	Huangpigu	upland rice	YAAS Gene Bank	Menghai, China
276	Landibaigu	upland rice	YAAS Gene Bank	Menghai, China
277	Landigu	upland rice	YAAS Gene Bank	Menghai, China
278	Nanwushu	upland rice	YAAS Gene Bank	Menghai, China
279	Shandibaigu	upland rice	YAAS Gene Bank	Menghai, China
280	Xiaohonggu	upland rice	YAAS Gene Bank	Menghai, China
281	Zhaluoge	upland rice	YAAS Gene Bank	Menglian,China
282	Caopigu	upland rice	YAAS Gene Bank	Mojiang,China
283	Hongjiaogu	upland rice	YAAS Gene Bank	Mojiang,China
284	Jiudiheigu	upland rice	YAAS Gene Bank	Mojiang,China
285	Jiudihuagu	upland rice	YAAS Gene Bank	Mojiang,China
286	Mengmanbaigu	upland rice	YAAS Gene Bank	Mojiang,China
287	Nandagu	upland rice	YAAS Gene Bank	Mojiang,China
288	Shanerkuai	upland rice	YAAS Gene Bank	Mojiang,China
289	Shannuo	upland rice	YAAS Gene Bank	Mojiang,China
290	Shanzinuo	upland rice	YAAS Gene Bank	Mojiang,China
291	Bailan	upland rice	YAAS Gene Bank	Shizong,China
292	Chipanggu	upland rice	YAAS Gene Bank	Shizong,China
293	Dahongguxuan-3	upland rice	YAAS Gene Bank	Shizong,China
294	Hongxuan4	upland rice	YAAS Gene Bank	Shizong,China
295	Jiaojiajingdabaigu	upland rice	YAAS Gene Bank	Shizong,China
296	Genghong	upland rice	YAAS Gene Bank	Shizong,China
297	Luxiangbai	upland rice	YAAS Gene Bank	Shizong,China
298	Wulongdabaigu	upland rice	YAAS Gene Bank	Shizong,China
299	Xiaohonggu	upland rice	YAAS Gene Bank	Shizong,China
300	Yanzhinuo	upland rice	YAAS Gene Bank	Shizong,China
301	Yuanhonggu	upland rice	YAAS Gene Bank	Shizong,China
302	Zigu	upland rice	YAAS Gene Bank	Shizong,China
303	Sanbang70luo	upland rice	YAAS Gene Bank	Tengchong, China
304	Huangpigu	upland rice	YAAS Gene Bank	Wenshan, China
305	Shoudidabaigu	upland rice	YAAS Gene Bank	Wenshan, China
306	Yangbiguangkeludao	upland rice	YAAS Gene Bank	Yangbi,China
307	Dabaigu	upland rice	YAAS Gene Bank	Yuanyang,China
308	Canyuanhanzinuo	upland rice	YAAS Gene Bank	Cangyuan,China
309	Qianshaohangu	upland rice	YAAS Gene Bank	Cangyuan,China
310	Zhenkangzaonuo	upland rice	YAAS Gene Bank	Zhenkang,China
311	Digannuo	upland rice	YAAS Gene Bank	Guangdong, China
312	Linghe	upland rice	YAAS Gene Bank	Guangdong, China
313	Cehengguangkenuo	upland rice	YAAS Gene Bank	Guizhou, China
314	Cehenghandao	upland rice	YAAS Gene Bank	Guizhou, China
315	Cehengwuyanuo	upland rice	YAAS Gene Bank	Guizhou, China
316	Dali"sanlicun"nuo	upland rice	YAAS Gene Bank	Guizhou, China
317	Dejianggoudiantou	upland rice	YAAS Gene Bank	Guizhou, China
318	Heiyungengnian	upland rice	YAAS Gene Bank	Guizhou, China
319	Hongkegengnian	upland rice	YAAS Gene Bank	Guizhou, China
320	Huangyingtaonuo	upland rice	YAAS Gene Bank	Guizhou, China
321	Pingbahannuogu	upland rice	YAAS Gene Bank	Guizhou, China
322	Qinghonghuangnuo	upland rice	YAAS Gene Bank	Guizhou, China
323	Wangmofeienian	upland rice	YAAS Gene Bank	Guizhou, China
324	Xiaohuanghongminian	upland rice	YAAS Gene Bank	Guizhou, China
325	Xingrenhonghanniangu	upland rice	YAAS Gene Bank	Guizhou, China
326	Xiuwenhongkeling	upland rice	YAAS Gene Bank	Guizhou, China
327	Yougengdao	upland rice	YAAS Gene Bank	Guizhou, China
328	Zhenfenghanqingnuo	upland rice	YAAS Gene Bank	Guizhou, China
329	Zhouzhaihongkehandao	upland rice	YAAS Gene Bank	Guizhou, China
330	Zunyihangu	upland rice	YAAS Gene Bank	Guizhou, China
