# Supplementary material for: A Genetic Resource for Rice Improvement: Introgression Library of Agronomic Traits for All AA Genome Oryza Species
Source: Front Plant Sci. 2022 Mar 24;13:856514. doi: 10.3389/fpls.2022.856514 (PMC8992386; doi:10.3389/fpls.2022.856514)
Supplement: Supplementary file 2 [file Table_2.xlsx]

## Sheet: Sheet1
	Donor	Accession NO.	Recipient	Number of introgression lines	Generations
1	O.barthii	Acc.104318	Dianjingyou 1	4	BC3F7
2	O.barthii	Acc.105507	Dianjingyou 1	6	BC3F7
3	O.barthii	Acc.105987	Dianjingyou 1	10	BC3F7
4	O.barthii	Acc.100936	Dianjingyou 1	9	BC3F7
5	O.glumaepatula	Acc.100184	Dianjingyou 1	1	BC2F8
6	O.glumaepatula	Acc.100184	Dianjingyou 1	25	BC3F6
7	O.glumaepatula	Acc.104386	Dianjingyou 1	2	BC2F8
8	O.glumaepatula	Acc.105662	Dianjingyou 1	2	BC2F8
9	O.meridionalis	Acc.82031	Dianjingyou 1	3	BC3F7
10	O.meridionalis	Acc.101145	Dianjingyou 1	2	BC2F8
11	O.meridionalis	Acc.101145	Dianjingyou 1	31	BC3F7
12	O.meridionalis	Acc.103322	Dianjingyou 1	19	BC3F7
13	O.meridionalis	Acc.104085	Dianjingyou 1	11	BC3F7
14	O.meridionalis	Acc.104498	Dianjingyou 1	10	BC3F7
15	O.nivara	Acc.80453	Dianjingyou 1	23	BC3F7
16	O.nivara	Acc.80581	Dianjingyou 1	18	BC2F8
17	O.nivara	Acc.80581	Dianjingyou 1	74	BC3F7
18	O.nivara	Acc.80611	Dianjingyou 1	6	BC2F8
19	O.nivara	Acc.80611	Dianjingyou 1	15	BC3F7
20	O.nivara	Acc.80625	Dianjingyou 1	15	BC2F8
21	O.nivara	Acc.80625	Dianjingyou 1	30	BC3F7
22	O.nivara	Acc.80677	Dianjingyou 1	5	BC2F8
23	O.nivara	Acc.80677	Dianjingyou 1	32	BC3F7
24	O.nivara	Acc.80681	Dianjingyou 1	4	BC2F8
25	O.nivara	Acc.80681	Dianjingyou 1	6	BC3F7
26	O.nivara	Acc.80722	Dianjingyou 1	6	BC2F8
27	O.nivara	Acc.80722	Dianjingyou 1	14	BC3F7
28	O.nivara	Acc.80724	Dianjingyou 1	2	BC2F8
29	O.nivara	Acc.80724	Dianjingyou 1	11	BC3F7
30	O.nivara	Acc.81855	Dianjingyou 1	3	BC2F8
31	O.nivara	Acc.81855	Dianjingyou 1	35	BC3F7
32	O.nivara	Acc.81867	Dianjingyou 1	5	BC3F7
33	O.nivara	Acc.82005	Dianjingyou 1	1	BC2F8
34	O.nivara	Acc.82005	Dianjingyou 1	3	BC3F7
35	O.nivara	Acc.100195	Dianjingyou 1	13	BC2F8
36	O.nivara	Acc.100195	Dianjingyou 1	9	BC3F7
37	O.nivara	Acc.100593	Dianjingyou 1	2	BC2F8
38	O.nivara	Acc.100593	Dianjingyou 1	9	BC3F7
39	O.nivara	Acc.101508	Dianjingyou 1	39	BC3F7
40	O.rufipogon	Acc.80433	Dianjingyou 1	2	BC2F8
41	O.rufipogon	Acc.80680	Dianjingyou 1	1	BC3F7
42	O.rufipogon	Acc.80680	Dianjingyou 1	3	BC2F8
43	O.rufipogon	Acc.82011	Dianjingyou 1	18	BC3F7
44	O.rufipogon	Acc.103308	Dianjingyou 1	8	BC2F8
45	O.rufipogon	Acc.103308	Dianjingyou 1	9	BC3F7
46	O.rufipogon	Acc.105832	Dianjingyou 1	13	BC2F8
47	O.rufipogon	Acc.106133	Dianjingyou 1	3	BC3F7
48	O.rufipogon	Acc.106133	Dianjingyou 1	2	BC3F7
49	O.rufipogon	Dongxiang common wild rice	Dianjingyou 1	5	BC2F8
50	O.rufipogon	Dongxiang common wild rice	Dianjingyou 1	5	BC3F7
51	O.rufipogon	Yuanjiang common wild rice	Dianjingyou 1	5	BC3F7
52	O. glaberrima	IRGC102295	Dianjingyou 1	2	BC5F8
53	O. glaberrima	IRGC102555	Dianjingyou 1	1	BC4F9
54	O. glaberrima	IRGC102583	Dianjingyou 1	1	BC3F10
55	O. glaberrima	IRGC102583	Dianjingyou 1	2	BC4F9
56	O. glaberrima	IRGC102583	Dianjingyou 1	1	BC6F7
57	O. glaberrima	IRGC102375	Dianjingyou 1	1	BC2F17
58	O. glaberrima	IRGC100149	Dianjingyou 1	1	BC2F17
59	O. glaberrima	IRGC102718	Dianjingyou 1	1	BC6F7
60	O. glaberrima	IRGC103502	Dianjingyou 1	1	BC5F8
61	O. glaberrima	IRGC102692	Dianjingyou 1	1	BC4F9
62	O. glaberrima	IRGC100149	Dianjingyou 1	1	BC3F10
63	O. glaberrima	IRGC101901	Dianjingyou 1	1	BC3F10
64	O. glaberrima	IRGC102540	Dianjingyou 1	1	BC3F10
65	O. glaberrima	IRGC101854	Dianjingyou 1	1	BC5F8
66	O. glaberrima	IRGC102986	Dianjingyou 1	1	BC5F8
67	O. glaberrima	IRGC102295	Dianjingyou 1	1	BC5F8
68	O. glaberrima	IRGC102540	Dianjingyou 1	1	BC3F12
69	O. glaberrima	IRGC100156	Dianjingyou 1	2	BC4F9
70	O. glaberrima	IRGC102928	Dianjingyou 1	2	BC4F9
71	O. glaberrima	IRGC103502	Dianjingyou 1	1	BC4F9
72	O. glaberrima	IRGC102540	Dianjingyou 1	1	BC3F12
73	O. glaberrima	IRGC101854	Dianjingyou 1	1	BC4F9
74	O. glaberrima	IRGC102254	Dianjingyou 1	1	BC4F9
75	O. glaberrima	IRGC103956	Dianjingyou 1	1	BC4F9
76	O. glaberrima	IRGC103146	Dianjingyou 1	1	BC4F9
77	O. glaberrima	IRGC102583	Dianjingyou 1	1	BC3F10
78	O. glaberrima	IRGC100140	Dianjingyou 1	1	BC3F10
79	O. glaberrima	IRGC101901	Dianjingyou 1	1	BC3F10
80	O. glaberrima	IRGC102540	Dianjingyou 1	1	BC3F10
81	O. glaberrima	IRGC103144	Dianjingyou 1	1	BC2F11
82	O. glaberrima	IRGC102583	Dianjingyou 1	1	BC6F7
83	O. glaberrima	IRGC102939	Dianjingyou 1	1	BC6F7
84	O. glaberrima	IRGC104586	Dianjingyou 1	1	BC6F7
85	O. glaberrima	IRGC104586	Dianjingyou 1	1	BC6F7
86	O. glaberrima	IRGC102692	Dianjingyou 1	1	BC4F9
87	O. glaberrima	IRGC103146	Dianjingyou 1	1	BC4F9
88	O. glaberrima	IRGC102540	Dianjingyou 1	1	BC5F8
89	O. glaberrima	IRGC102928	Dianjingyou 1	1	BC4F9
90	O. glaberrima	IRGC100127	Dianjingyou 1	2	BC4F9
91	O. glaberrima	IRGC102555	Dianjingyou 1	1	BC4F9
92	O. glaberrima	IRGC102295	Dianjingyou 1	1	BC5F8
93	O. glaberrima	IRGC102950	Dianjingyou 1	2	BC3F10
94	O. glaberrima	IRGC104023	Dianjingyou 1	1	BC4F9
95	O. glaberrima	IRGC104162	Dianjingyou 1	1	BC4F9
96	O. glaberrima	IRGC104038	Dianjingyou 1	1	BC4F9
97	O. glaberrima	IRGC104039	Dianjingyou 1	1	BC4F9
98	O. glaberrima	CG17	Dianjingyou 1	1	BC4F9
99	O. glaberrima	IRGC103983	Dianjingyou 1	1	BC4F9
100	O. glaberrima	IRGC102310	Dianjingyou 1	1	BC6F7
101	O. glaberrima	IRGC101901	Dianjingyou 1	1	BC4F9
102	O. glaberrima	IRGC102295	Dianjingyou 1	1	BC4F9
103	O. glaberrima	IRGC102310	Dianjingyou 1	1	BC4F9
104	O. glaberrima	IRGC102555	Dianjingyou 1	1	BC4F9
105	O. glaberrima	IRGC102583	Dianjingyou 1	1	BC4F9
106	O. glaberrima	IRGC103956	Dianjingyou 1	1	BC4F9
107	O. glaberrima	IRGC104162	Dianjingyou 1	1	BC4F9
108	O. glaberrima	IRGC101901	Dianjingyou 1	1	BC3F10
109	O. glaberrima	IRGC100156	Dianjingyou 1	1	BC4F11
110	O. glaberrima	IRGC102846	Dianjingyou 1	1	BC4F9
111	O. glaberrima	IRGC104162	Dianjingyou 1	1	BC4F9
112	O. glaberrima	IRGC102846	Dianjingyou 1	1	BC4F9
113	O. glaberrima	IRGC103973	Dianjingyou 1	1	BC4F9
114	O. glaberrima	IRGC102310	Dianjingyou 1	1	BC5F8
115	O. glaberrima	IRGC104005	Dianjingyou 1	1	BC4F9
116	O. glaberrima	IRGC102928	Dianjingyou 1	1	BC4F9
117	O. glaberrima	IRGC103973	Dianjingyou 1	1	BC4F9
118	O. glaberrima	IRGC103983	Dianjingyou 1	1	BC4F9
119	O. glaberrima	IRGC102928/	Dianjingyou 1	1	BC4F9
120	O. glaberrima	IRGC103973	Dianjingyou 1	1	BC4F9
121	O. glaberrima	IRGC104023	Dianjingyou 1	1	BC4F9
122	O. glaberrima	IRGC102583	Dianjingyou 1	1	BC4F11
123	O. glaberrima	IRGC102540	Dianjingyou 1	1	BC3F10
124	O. glaberrima	IRGC102583	Dianjingyou 1	1	BC4F9
125	O. glaberrima	IRGC102583	Dianjingyou 1	1	BC3F10
126	O. glaberrima	IRGC102310	Dianjingyou 1	1	BC3F10
127	upland rice	AZUCENA	Dianjingyou 1	7	BC2F8
128	upland rice	B6144F-MR-6	Dianjingyou 1	21	BC2F8
129	upland rice	BR21	Dianjingyou 1	11	BC2F8
130	upland rice	CIRAD 411	Dianjingyou 1	9	BC2F8
131	upland rice	Dourado Precoce	Dianjingyou 1	21	BC2F8
132	upland rice	Dular	Dianjingyou 1	4	BC2F8
133	upland rice	IAC1246	Dianjingyou 1	22	BC2F8
134	upland rice	IAC25	Dianjingyou 1	29	BC2F8
135	upland rice	IR55423-01	Dianjingyou 1	27	BC2F8
136	upland rice	IRAT104	Dianjingyou 1	19	BC2F8
137	upland rice	ITA325	Dianjingyou 1	23	BC2F8
138	upland rice	Moroberekan	Dianjingyou 1	21	BC2F8
139	upland rice	OS6	Dianjingyou 1	12	BC2F8
140	upland rice	UPL RI-5	Dianjingyou 1	1	BC2F8
141	upland rice	WAB56-50	Dianjingyou 1	5	BC2F8
142	upland rice	Aihonggu	Dianjingyou 1	3	BC2F8
143	upland rice	Anshunangu	Dianjingyou 1	1	BC2F8
144	upland rice	Bailan	Dianjingyou 1	4	BC2F8
145	upland rice	Beizigu	Dianjingyou 1	2	BC2F8
146	upland rice	Beizichangmao	Dianjingyou 1	2	BC2F8
147	upland rice	Fuyegu	Dianjingyou 1	5	BC2F8
148	upland rice	Cangyuanhanzinuo	Dianjingyou 1	11	BC2F8
149	upland rice	Cangzhugu	Dianjingyou 1	4	BC2F8
150	upland rice	Caopigu	Dianjingyou 1	15	BC2F8
151	upland rice	Cehengguangkenuo	Dianjingyou 1	1	BC2F8
152	upland rice	Cehengwuyanuo	Dianjingyou 1	2	BC2F8
153	upland rice	Dabaigu	Dianjingyou 1	80	BC2F8
154	upland rice	Dahuigu	Dianjingyou 1	3	BC2F8
155	upland rice	Dejianggoudiantou	Dianjingyou 1	3	BC2F8
156	upland rice	Digannuo	Dianjingyou 1	10	BC2F8
157	upland rice	Digunuo	Dianjingyou 1	6	BC2F8
158	upland rice	Fengqingyingzuigu	Dianjingyou 1	6	BC2F8
159	upland rice	Haodali	Dianjingyou 1	2	BC2F8
160	upland rice	Haohaozao	Dianjingyou 1	15	BC2F8
161	upland rice	Haomenglong	Dianjingyou 1	10	BC2F8
162	upland rice	Haomengnan	Dianjingyou 1	2	BC2F8
163	upland rice	Haonanwen	Dianjingyou 1	4	BC2F8
164	upland rice	Haonanda	Dianjingyou 1	9	BC2F8
165	upland rice	Haonuohe	Dianjingyou 1	1	BC2F8
166	upland rice	Hekegengnian	Dianjingyou 1	2	BC2F8
167	upland rice	Hongxinnuo	Dianjingyou 1	2	BC2F8
168	upland rice	Huakenuo	Dianjingyou 1	2	BC2F8
169	upland rice	Huangpigu	Dianjingyou 1	7	BC2F8
170	upland rice	Huangyingtaonuo	Dianjingyou 1	5	BC2F8
171	upland rice	Jiudiheigu	Dianjingyou 1	9	BC2F8
172	upland rice	Kaonuoliang	Dianjingyou 1	13	BC2F8
173	upland rice	Landibaigu	Dianjingyou 1	4	BC2F8
174	upland rice	Landigu	Dianjingyou 1	7	BC2F8
175	upland rice	Linghe	Dianjingyou 1	4	BC2F8
176	upland rice	lunanhanzao	Dianjingyou 1	7	BC2F8
177	upland rice	Mengmanbaigu	Dianjingyou 1	5	BC2F8
178	upland rice	Mengtigu	Dianjingyou 1	2	BC2F8
179	upland rice	Nanwushu	Dianjingyou 1	10	BC2F8
180	upland rice	Pingbahannuogu	Dianjingyou 1	1	BC2F8
181	upland rice	Qinglonghuangnuo	Dianjingyou 1	3	BC2F8
182	upland rice	Sanlicun	Dianjingyou 1	7	BC2F8
183	upland rice	Shanerkuai	Dianjingyou 1	22	BC2F8
184	upland rice	Shannuo	Dianjingyou 1	1	BC2F8
185	upland rice	Shanzinuo	Dianjingyou 1	5	BC2F8
186	upland rice	Shoudidabaigu	Dianjingyou 1	4	BC2F8
187	upland rice	Taitougu	Dianjingyou 1	1	BC2F8
188	upland rice	Wangmofeiernian	Dianjingyou 1	2	BC2F8
189	upland rice	Wulongdabaigu	Dianjingyou 1	2	BC2F8
190	upland rice	Xiaobaigu	Dianjingyou 1	16	BC2F8
191	upland rice	Xiaogu	Dianjingyou 1	1	BC2F8
192	upland rice	Xiaohongbaigu	Dianjingyou 1	6	BC2F8
193	upland rice	Xiaohonggu	Dianjingyou 1	2	BC2F8
194	upland rice	Xiaohuanghongminian	Dianjingyou 1	2	BC2F8
195	upland rice	Xiuwenhongkeling	Dianjingyou 1	1	BC2F8
196	upland rice	Yaorengu	Dianjingyou 1	12	BC2F8
197	upland rice	Yougengdao	Dianjingyou 1	5	BC2F8
198	upland rice	Yunlu11	Dianjingyou 1	1	BC2F8
199	upland rice	Yunlu28	Dianjingyou 1	7	BC2F8
200	upland rice	Yunlu29	Dianjingyou 1	2	BC2F8
201	upland rice	Yunlu5	Dianjingyou 1	6	BC2F8
202	upland rice	Yunlu55	Dianjingyou 1	1	BC2F8
203	upland rice	Yunlu56	Dianjingyou 1	6	BC2F8
204	upland rice	Yunlu59	Dianjingyou 1	8	BC2F8
205	upland rice	Yunlu63	Dianjingyou 1	5	BC2F8
206	upland rice	Yunlu64	Dianjingyou 1	26	BC2F8
207	upland rice	Yunlu65	Dianjingyou 1	2	BC2F8
208	upland rice	Yunlu71	Dianjingyou 1	5	BC2F8
209	upland rice	Yunlu87	Dianjingyou 1	5	BC2F8
210	upland rice	Yunlu88	Dianjingyou 1	2	BC2F8
211	upland rice	Yunlu89	Dianjingyou 1	12	BC2F8
212	upland rice	Yunlu91	Dianjingyou 1	4	BC2F8
213	upland rice	Yunlu97	Dianjingyou 1	12	BC2F8
214	upland rice	Yunlu98	Dianjingyou 1	6	BC2F8
215	upland rice	Zhaluoge	Dianjingyou 1	7	BC2F8
216	upland rice	Zhaxima	Dianjingyou 1	4	BC2F8
217	upland rice	Zhenkanghannuo	Dianjingyou 1	5	BC2F8

## Sheet: Sheet2
	滇粳优1号	云陆89			滇粳优1号
	滇粳优1号	云陆89			滇粳优1号
	滇粳优1号	云陆98			滇粳优1号
	滇粳优1号	IAC1246			滇粳优1号
	滇粳优1号	IAC1246			滇粳优1号
	滇粳优1号	IAC1246			滇粳优1号
	滇粳优1号	IAC1246			滇粳优1号
	滇粳优1号	IAC1246			滇粳优1号
	滇粳优1号	IAC1246			滇粳优1号
	滇粳优1号	IAC1246			滇粳优1号
	滇粳优1号	IAC1246			滇粳优1号
	滇粳优1号	IAC1246			滇粳优1号
	滇粳优1号	IAC1246			滇粳优1号
	滇粳优1号	IAC1246			滇粳优1号
	滇粳优1号	IRAT104			滇粳优1号
	滇粳优1号	IRAT104			滇粳优1号
	滇粳优1号	IRAT104			滇粳优1号
	滇粳优1号	IRAT104			滇粳优1号
	滇粳优1号	CIRAD 411			滇粳优1号
	滇粳优1号	CIRAD 411			滇粳优1号
	滇粳优1号	CIRAD 411			滇粳优1号
	滇粳优1号	CIRAD 411			滇粳优1号
	滇粳优1号	大灰谷			滇粳优1号
	滇粳优1号	大灰谷			滇粳优1号
	滇粳优1号	考糯亮			滇粳优1号
	滇粳优1号	考糯亮			滇粳优1号
	滇粳优1号	小白谷			滇粳优1号
	滇粳优1号	小白谷			滇粳优1号
	滇粳优1号	小白谷			滇粳优1号
	滇粳优1号	小红白谷			滇粳优1号
	滇粳优1号	小红白谷			滇粳优1号
	滇粳优1号	小红白谷			滇粳优1号
	滇粳优1号	小红白谷			滇粳优1号
	滇粳优1号	地谷糯			滇粳优1号
	滇粳优1号	地谷糯			滇粳优1号
	滇粳优1号	地谷糯			滇粳优1号
	滇粳优1号	博叶谷			滇粳优1号
	滇粳优1号	博叶谷			滇粳优1号
	滇粳优1号	博叶谷			滇粳优1号
	滇粳优1号	大白谷			滇粳优1号
	滇粳优1号	大白谷			滇粳优1号
	滇粳优1号	大白谷			滇粳优1号
	滇粳优1号	大白谷			滇粳优1号
	滇粳优1号	大白谷			滇粳优1号
	滇粳优1号	大白谷			滇粳优1号
	滇粳优1号	大白谷			滇粳优1号
	滇粳优1号	大白谷			滇粳优1号
	滇粳优1号	大白谷			滇粳优1号
	滇粳优1号	大白谷			滇粳优1号
	滇粳优1号	大白谷			滇粳优1号
	滇粳优1号	大白谷			滇粳优1号
	滇粳优1号	大白谷			滇粳优1号
	滇粳优1号	大白谷			滇粳优1号
	滇粳优1号	大白谷			滇粳优1号
	滇粳优1号	大白谷			滇粳优1号
	滇粳优1号	大白谷			滇粳优1号
	滇粳优1号	大白谷			滇粳优1号
	滇粳优1号	大白谷			滇粳优1号
	滇粳优1号	大白谷			滇粳优1号
	滇粳优1号	大白谷			滇粳优1号
	滇粳优1号	大白谷			滇粳优1号
	滇粳优1号	Moroberekan			滇粳优1号
	滇粳优1号	Moroberekan			滇粳优1号
	滇粳优1号	Moroberekan			滇粳优1号
	滇粳优1号	Moroberekan			滇粳优1号
	滇粳优1号	OS6			滇粳优1号
	滇粳优1号	OS6			滇粳优1号
	滇粳优1号	OS6			滇粳优1号
	滇粳优1号	OS6			滇粳优1号
	滇粳优1号	OS6			滇粳优1号
	滇粳优1号	OS6			滇粳优1号
	滇粳优1号	B6144F-MR-6			滇粳优1号
	滇粳优1号	B6144F-MR-6			滇粳优1号
	滇粳优1号	大白谷			滇粳优1号
	滇粳优1号	大白谷			滇粳优1号
	滇粳优1号	大白谷			滇粳优1号
	滇粳优1号	大白谷			滇粳优1号
	滇粳优1号	大白谷			滇粳优1号
	滇粳优1号	大白谷			滇粳优1号
	滇粳优1号	大白谷			滇粳优1号
	滇粳优1号	大白谷			滇粳优1号
	滇粳优1号	大白谷			滇粳优1号
	滇粳优1号	大白谷			滇粳优1号
	滇粳优1号	大白谷			滇粳优1号
	滇粳优1号	大白谷			滇粳优1号
	滇粳优1号	大白谷			滇粳优1号
	滇粳优1号	大白谷			滇粳优1号
	滇粳优1号	大白谷			滇粳优1号
	滇粳优1号	大白谷			滇粳优1号
	滇粳优1号	大白谷			滇粳优1号
	滇粳优1号	大白谷			滇粳优1号
	滇粳优1号	大白谷			滇粳优1号
	滇粳优1号	大白谷			滇粳优1号
	滇粳优1号	大白谷			滇粳优1号
	滇粳优1号	大白谷			滇粳优1号
	滇粳优1号	大白谷			滇粳优1号
	滇粳优1号	大白谷			滇粳优1号
	滇粳优1号	大白谷			滇粳优1号
	滇粳优1号	OS6			滇粳优1号
	滇粳优1号	毫勐龙			滇粳优1号
	滇粳优1号	岭禾			滇粳优1号
	滇粳优1号	岭禾			滇粳优1号
	滇粳优1号	岭禾			滇粳优1号
	滇粳优1号	岭禾			滇粳优1号
	滇粳优1号	小黄红米粘			滇粳优1号
	滇粳优1号	云陆28			滇粳优1号
	滇粳优1号	大白谷			滇粳优1号
	滇粳优1号	南务树			滇粳优1号
	滇粳优1号	Dular			滇粳优1号
	滇粳优1号	云陆59			滇粳优1号
	滇粳优1号	Dourado Precoce			滇粳优1号
	滇粳优1号	Dourado Precoce			滇粳优1号
	滇粳优1号	IAC1246			滇粳优1号
	滇粳优1号	IRAT104			滇粳优1号
	滇粳优1号	IRAT104			滇粳优1号
	滇粳优1号	CIRAD 411			滇粳优1号
	滇粳优1号	CIRAD 411			滇粳优1号
	滇粳优1号	CIRAD 411			滇粳优1号
	滇粳优1号	CIRAD 411			滇粳优1号
	滇粳优1号	AZUCENA			滇粳优1号
	滇粳优1号	AZUCENA			滇粳优1号
	滇粳优1号	AZUCENA			滇粳优1号
	滇粳优1号	AZUCENA			滇粳优1号
	滇粳优1号	AZUCENA			滇粳优1号
	滇粳优1号	BR21			滇粳优1号
	滇粳优1号	BR21			滇粳优1号
	滇粳优1号	云陆5			滇粳优1号
	滇粳优1号	云陆5			滇粳优1号
	滇粳优1号	云陆59			滇粳优1号
	滇粳优1号	云陆59			滇粳优1号
	滇粳优1号	云陆59			滇粳优1号
	滇粳优1号	云陆63			滇粳优1号
	滇粳优1号	云陆63			滇粳优1号
	滇粳优1号	云陆89			滇粳优1号
	滇粳优1号	云陆89			滇粳优1号
	滇粳优1号	云陆89			滇粳优1号
	滇粳优1号	云陆99			滇粳优1号
	滇粳优1号	Dourado Precoce			滇粳优1号
	滇粳优1号	Dourado Precoce			滇粳优1号
	滇粳优1号	IAC1246			滇粳优1号
	滇粳优1号	IAC1246			滇粳优1号
	滇粳优1号	IAC1246			滇粳优1号
	滇粳优1号	IAC25			滇粳优1号
	滇粳优1号	IAC25			滇粳优1号
	滇粳优1号	IAC25			滇粳优1号
	滇粳优1号	IAC25			滇粳优1号
	滇粳优1号	IAC25			滇粳优1号
	滇粳优1号	IAC25			滇粳优1号
	滇粳优1号	IAC25			滇粳优1号
	滇粳优1号	IRAT104			滇粳优1号
	滇粳优1号	IRAT104			滇粳优1号
	滇粳优1号	IRAT104			滇粳优1号
	滇粳优1号	IRAT104			滇粳优1号
	滇粳优1号	IRAT104			滇粳优1号
	滇粳优1号	IRAT104			滇粳优1号
	滇粳优1号	IRAT104			滇粳优1号
	滇粳优1号	IRAT104			滇粳优1号
	滇粳优1号	背子长毛			滇粳优1号
	滇粳优1号	背子长毛			滇粳优1号
	滇粳优1号	凤庆尖嘴谷			滇粳优1号
	滇粳优1号	凤庆尖嘴谷			滇粳优1号
	滇粳优1号	红心糯			滇粳优1号
	滇粳优1号	红心糯			滇粳优1号
	滇粳优1号	考糯亮			滇粳优1号
	滇粳优1号	考糯亮			滇粳优1号
	滇粳优1号	考糯亮			滇粳优1号
	滇粳优1号	考糯亮			滇粳优1号
	滇粳优1号	考糯亮			滇粳优1号
	滇粳优1号	考糯亮			滇粳优1号
	滇粳优1号	小白谷			滇粳优1号
	滇粳优1号	小白谷			滇粳优1号
	滇粳优1号	小白谷			滇粳优1号
	滇粳优1号	小白谷			滇粳优1号
	滇粳优1号	小白谷			滇粳优1号
	滇粳优1号	小白谷			滇粳优1号
	滇粳优1号	小白谷			滇粳优1号
	滇粳优1号	小白谷			滇粳优1号
	滇粳优1号	小白谷			滇粳优1号
	滇粳优1号	小红白谷			滇粳优1号
	滇粳优1号	小红白谷			滇粳优1号
	滇粳优1号	地干糯			滇粳优1号
	滇粳优1号	地干糯			滇粳优1号
	滇粳优1号	地干糯			滇粳优1号
	滇粳优1号	地干糯			滇粳优1号
	滇粳优1号	地干糯			滇粳优1号
	滇粳优1号	三粒寸			滇粳优1号
	滇粳优1号	三粒寸			滇粳优1号
	滇粳优1号	三粒寸			滇粳优1号
	滇粳优1号	册亨乌鸦糯			滇粳优1号
	滇粳优1号	册亨乌鸦糯			滇粳优1号
	滇粳优1号	望漠飞蛾粘			滇粳优1号
	滇粳优1号	望漠飞蛾粘			滇粳优1号
	滇粳优1号	黄皮谷			滇粳优1号
	滇粳优1号	花壳糯			滇粳优1号
	滇粳优1号	毫好早			滇粳优1号
	滇粳优1号	毫好早			滇粳优1号
	滇粳优1号	毫好早			滇粳优1号
	滇粳优1号	毫好早			滇粳优1号
	滇粳优1号	毫好早			滇粳优1号
	滇粳优1号	毫好早			滇粳优1号
	滇粳优1号	毫好早			滇粳优1号
	滇粳优1号	毫好早			滇粳优1号
	滇粳优1号	毫好早			滇粳优1号
	滇粳优1号	毫好早			滇粳优1号
	滇粳优1号	毫好早			滇粳优1号
	滇粳优1号	毫好早			滇粳优1号
	滇粳优1号	瘦地大白谷			滇粳优1号
	滇粳优1号	瘦地大白谷			滇粳优1号
	滇粳优1号	小谷			滇粳优1号
	滇粳优1号	扎西马			滇粳优1号
	滇粳优1号	扎西马			滇粳优1号
	滇粳优1号	扎西马			滇粳优1号
	滇粳优1号	扎西马			滇粳优1号
	滇粳优1号	路南旱谷			滇粳优1号
	滇粳优1号	路南旱谷			滇粳优1号
	滇粳优1号	路南旱谷			滇粳优1号
	滇粳优1号	路南旱谷			滇粳优1号
	滇粳优1号	大白谷			滇粳优1号
	滇粳优1号	大白谷			滇粳优1号
	滇粳优1号	大白谷			滇粳优1号
	滇粳优1号	大白谷			滇粳优1号
	滇粳优1号	大白谷			滇粳优1号
	滇粳优1号	大白谷			滇粳优1号
	滇粳优1号	大白谷			滇粳优1号
	滇粳优1号	背子谷			滇粳优1号
	滇粳优1号	背子谷			滇粳优1号
	滇粳优1号	沧竹谷			滇粳优1号
	滇粳优1号	沧竹谷			滇粳优1号
	滇粳优1号	沧竹谷			滇粳优1号
	滇粳优1号	沧竹谷			滇粳优1号
	滇粳优1号	毫难打			滇粳优1号
	滇粳优1号	毫难打			滇粳优1号
	滇粳优1号	毫难打			滇粳优1号
	滇粳优1号	烂地谷			滇粳优1号
	滇粳优1号	烂地谷			滇粳优1号
	滇粳优1号	烂地谷			滇粳优1号
	滇粳优1号	草皮谷			滇粳优1号
	滇粳优1号	草皮谷			滇粳优1号
	滇粳优1号	旧地花谷			滇粳优1号
	滇粳优1号	旧地花谷			滇粳优1号
	滇粳优1号	旧地花谷			滇粳优1号
	滇粳优1号	旧地花谷			滇粳优1号
	滇粳优1号	旧地花谷			滇粳优1号
	滇粳优1号	旧地花谷			滇粳优1号
	滇粳优1号	旧地花谷			滇粳优1号
	滇粳优1号	勐曼白谷			滇粳优1号
	滇粳优1号	勐曼白谷			滇粳优1号
	滇粳优1号	勐曼白谷			滇粳优1号
	滇粳优1号	勐曼白谷			滇粳优1号
	滇粳优1号	山饵快			滇粳优1号
	滇粳优1号	山饵快			滇粳优1号
	滇粳优1号	山糯			滇粳优1号
	滇粳优1号	黄皮谷			滇粳优1号
	滇粳优1号	黄皮谷			滇粳优1号
	滇粳优1号	Moroberekan			滇粳优1号
	滇粳优1号	Moroberekan			滇粳优1号
	滇粳优1号	Moroberekan			滇粳优1号
	滇粳优1号	Moroberekan			滇粳优1号
	滇粳优1号	B6144F-MR-6			滇粳优1号
	滇粳优1号	B6144F-MR-6			滇粳优1号
	滇粳优1号	B6144F-MR-6			滇粳优1号
	滇粳优1号	五龙大白谷			滇粳优1号
	滇粳优1号	五龙大白谷			滇粳优1号
	滇粳优1号	B6144F-MR-6			滇粳优1号
	滇粳优1号	IR55423-01			滇粳优1号
	滇粳优1号	凤庆尖嘴谷			滇粳优1号
	滇粳优1号	地谷糯			滇粳优1号
	滇粳优1号	Moroberekan			滇粳优1号
	滇粳优1号	云陆64			滇粳优1号
	滇粳优1号	南务树			滇粳优1号
	滇粳优1号	扎罗戈			滇粳优1号
	滇粳优1号	旧地黑谷			滇粳优1号
	滇粳优1号	山饵快			滇粳优1号
	滇粳优1号	山饵快			滇粳优1号
	滇粳优1号	山饵快			滇粳优1号
	滇粳优1号	山饵快			滇粳优1号
	滇粳优1号	山饵快			滇粳优1号
	滇粳优1号	山饵快			滇粳优1号
	滇粳优1号	山紫糯			滇粳优1号
	滇粳优1号	山紫糯			滇粳优1号
	滇粳优1号	山紫糯			滇粳优1号
	滇粳优1号	沧源旱紫糯			滇粳优1号
	滇粳优1号	沧源旱紫糯			滇粳优1号
	滇粳优1号	镇康旱糯			滇粳优1号
	滇粳优1号	镇康旱糯			滇粳优1号
	滇粳优1号	镇康旱糯			滇粳优1号
	滇粳优1号	镇康旱糯			滇粳优1号
	滇粳优1号	地干糯			滇粳优1号
	滇粳优1号	地干糯			滇粳优1号
	滇粳优1号	地干糯			滇粳优1号
	滇粳优1号	瑶人谷			滇粳优1号
	滇粳优1号	瑶人谷			滇粳优1号
	滇粳优1号	大白谷			滇粳优1号
	滇粳优1号	大白谷			滇粳优1号
	滇粳优1号	大白谷			滇粳优1号
	滇粳优1号	大白谷			滇粳优1号
	滇粳优1号	大白谷			滇粳优1号
	滇粳优1号	大白谷			滇粳优1号
	滇粳优1号	毫大利			滇粳优1号
	滇粳优1号	毫南温			滇粳优1号
	滇粳优1号	毫南温			滇粳优1号
	滇粳优1号	烂地白谷			滇粳优1号
	滇粳优1号	烂地白谷			滇粳优1号
	滇粳优1号	烂地白谷			滇粳优1号
	滇粳优1号	烂地白谷			滇粳优1号
	滇粳优1号	山饵快			滇粳优1号
	滇粳优1号	山饵快			滇粳优1号
	滇粳优1号	山饵快			滇粳优1号
	滇粳优1号	Moroberekan			滇粳优1号
	滇粳优1号	Moroberekan			滇粳优1号
	滇粳优1号	IAC1246			滇粳优1号
	滇粳优1号	IAC25			滇粳优1号
	滇粳优1号	云陆11			滇粳优1号
	滇粳优1号	云陆59			滇粳优1号
	滇粳优1号	德江狗点头			滇粳优1号
	滇粳优1号	黄樱桃糯			滇粳优1号
	滇粳优1号	晴隆黄糯			滇粳优1号
	滇粳优1号	晴隆黄糯			滇粳优1号
	滇粳优1号	修文红壳岭			滇粳优1号
	滇粳优1号	Moroberekan			滇粳优1号
	滇粳优1号	ITA325			滇粳优1号
	滇粳优1号	ITA325			滇粳优1号
	滇粳优1号	ITA325			滇粳优1号
	滇粳优1号	ITA325			滇粳优1号
	滇粳优1号	ITA325			滇粳优1号
	滇粳优1号	ITA325			滇粳优1号
	滇粳优1号	ITA325			滇粳优1号
	滇粳优1号	ITA325			滇粳优1号
	滇粳优1号	IR55423-01			滇粳优1号
	滇粳优1号	云陆64			滇粳优1号
	滇粳优1号	云陆64			滇粳优1号
	滇粳优1号	云陆64			滇粳优1号
	滇粳优1号	云陆64			滇粳优1号
	滇粳优1号	云陆64			滇粳优1号
	滇粳优1号	云陆64			滇粳优1号
	滇粳优1号	云陆64			滇粳优1号
	滇粳优1号	云陆64			滇粳优1号
	滇粳优1号	云陆64			滇粳优1号
	滇粳优1号	云陆64			滇粳优1号
	滇粳优1号	云陆64			滇粳优1号
	滇粳优1号	云陆64			滇粳优1号
	滇粳优1号	小白谷			滇粳优1号
	滇粳优1号	小白谷			滇粳优1号
	滇粳优1号	小白谷			滇粳优1号
	滇粳优1号	瑶人谷			滇粳优1号
	滇粳优1号	瑶人谷			滇粳优1号
	滇粳优1号	瑶人谷			滇粳优1号
	滇粳优1号	瑶人谷			滇粳优1号
	滇粳优1号	瑶人谷			滇粳优1号
	滇粳优1号	瑶人谷			滇粳优1号
	滇粳优1号	瑶人谷			滇粳优1号
	滇粳优1号	瑶人谷			滇粳优1号
	滇粳优1号	瑶人谷			滇粳优1号
	滇粳优1号	毫勐龙			滇粳优1号
	滇粳优1号	毫勐龙			滇粳优1号
	滇粳优1号	毫勐龙			滇粳优1号
	滇粳优1号	毫勐龙			滇粳优1号
	滇粳优1号	大白谷			滇粳优1号
	滇粳优1号	大白谷			滇粳优1号
	滇粳优1号	大白谷			滇粳优1号
	滇粳优1号	大白谷			滇粳优1号
	滇粳优1号	大白谷			滇粳优1号
	滇粳优1号	大白谷			滇粳优1号
	滇粳优1号	大白谷			滇粳优1号
	滇粳优1号	大白谷			滇粳优1号
	滇粳优1号	大白谷			滇粳优1号
	滇粳优1号	大白谷			滇粳优1号
	滇粳优1号	大白谷			滇粳优1号
	滇粳优1号	毫难打			滇粳优1号
	滇粳优1号	毫难打			滇粳优1号
	滇粳优1号	毫难打			滇粳优1号
	滇粳优1号	毫难打			滇粳优1号
	滇粳优1号	山饵快			滇粳优1号
	滇粳优1号	山饵快			滇粳优1号
	滇粳优1号	山饵快			滇粳优1号
	滇粳优1号	山饵快			滇粳优1号
	滇粳优1号	山饵快			滇粳优1号
	滇粳优1号	山饵快			滇粳优1号
	滇粳优1号	白兰			滇粳优1号
	滇粳优1号	白兰			滇粳优1号
	滇粳优1号	白兰			滇粳优1号
	滇粳优1号	沧源旱紫糯			滇粳优1号
	滇粳优1号	沧源旱紫糯			滇粳优1号
	滇粳优1号	沧源旱紫糯			滇粳优1号
	滇粳优1号	沧源旱紫糯			滇粳优1号
	滇粳优1号	沧源旱紫糯			滇粳优1号
	滇粳优1号	沧源旱紫糯			滇粳优1号
	滇粳优1号	沧源旱紫糯			滇粳优1号
	滇粳优1号	IR55423-01			滇粳优1号
	滇粳优1号	毫南温			滇粳优1号
	滇粳优1号	南务树			滇粳优1号
	滇粳优1号	IR55423-01			滇粳优1号
	滇粳优1号	IR55423-01			滇粳优1号
	滇粳优1号	小红谷			滇粳优1号
	滇粳优1号	地干糯			滇粳优1号
	滇粳优1号	毫勐龙			滇粳优1号
	滇粳优1号	毫勐龙			滇粳优1号
	滇粳优1号	B6144F-MR-6			滇粳优1号
	滇粳优1号	IAC25			滇粳优1号
	滇粳优1号	IAC1246			滇粳优1号
	滇粳优1号	凤庆尖嘴谷			滇粳优1号
	滇粳优1号	平坝旱糯谷			滇粳优1号
	滇粳优1号	考糯亮			滇粳优1号
	滇粳优1号	IAC25			滇粳优1号
	滇粳优1号	云陆97			滇粳优1号
	滇粳优1号	凤庆尖嘴谷			滇粳优1号
	滇粳优1号	OS6			滇粳优1号
	滇粳优1号	ITA325			滇粳优1号
	滇粳优1号	云陆63			滇粳优1号
	滇粳优1号	云陆63			滇粳优1号
	滇粳优1号	云陆64			滇粳优1号
	滇粳优1号	云陆64			滇粳优1号
	滇粳优1号	云陆64			滇粳优1号
	滇粳优1号	云陆64			滇粳优1号
	滇粳优1号	云陆64			滇粳优1号
	滇粳优1号	云陆64			滇粳优1号
	滇粳优1号	毫难打			滇粳优1号
	滇粳优1号	白兰			滇粳优1号
	滇粳优1号	小红谷			滇粳优1号
	滇粳优1号	地干糯			滇粳优1号
	滇粳优1号	德江狗点头			滇粳优1号
	滇粳优1号	红壳粳粘			滇粳优1号
	滇粳优1号	红壳粳粘			滇粳优1号
	滇粳优1号	毫勐龙			滇粳优1号
	滇粳优1号	博叶谷			滇粳优1号
	滇粳优1号	大白谷			滇粳优1号
	滇粳优1号	大白谷			滇粳优1号
	滇粳优1号	大白谷			滇粳优1号
	滇粳优1号	大白谷			滇粳优1号
	滇粳优1号	大白谷			滇粳优1号
	滇粳优1号	黄皮谷			滇粳优1号
	滇粳优1号	黄皮谷			滇粳优1号
	滇粳优1号	烂地谷			滇粳优1号
	滇粳优1号	烂地谷			滇粳优1号
	滇粳优1号	烂地谷			滇粳优1号
	滇粳优1号	烂地谷			滇粳优1号
	滇粳优1号	南务树			滇粳优1号
	滇粳优1号	南务树			滇粳优1号
	滇粳优1号	南务树			滇粳优1号
	滇粳优1号	南务树			滇粳优1号
	滇粳优1号	南务树			滇粳优1号
	滇粳优1号	南务树			滇粳优1号
	滇粳优1号	南务树			滇粳优1号
	滇粳优1号	草皮谷			滇粳优1号
	滇粳优1号	草皮谷			滇粳优1号
	滇粳优1号	旧地黑谷			滇粳优1号
	滇粳优1号	山饵快			滇粳优1号
	滇粳优1号	山饵快			滇粳优1号
	滇粳优1号	山紫糯			滇粳优1号
	滇粳优1号	山紫糯			滇粳优1号
	滇粳优1号	镇康旱糯			滇粳优1号
	滇粳优1号	瑶人谷			滇粳优1号
	滇粳优1号	毫勐龙			滇粳优1号
	滇粳优1号	毫大利			滇粳优1号
	滇粳优1号	毫南温			滇粳优1号
	滇粳优1号	毫难打			滇粳优1号
	滇粳优1号	毫糯贺			滇粳优1号
	滇粳优1号	山饵快			滇粳优1号
	滇粳优1号	山饵快			滇粳优1号
	滇粳优1号	山饵快			滇粳优1号
	滇粳优1号	瘦地大白谷			滇粳优1号
	滇粳优1号	瘦地大白谷			滇粳优1号
	滇粳优1号	大白谷			滇粳优1号
	滇粳优1号	大白谷			滇粳优1号
	滇粳优1号	IAC1246			滇粳优1号
	滇粳优1号	IAC25			滇粳优1号
	滇粳优1号	ITA325			滇粳优1号
	滇粳优1号	ITA325			滇粳优1号
	滇粳优1号	ITA325			滇粳优1号
	滇粳优1号	ITA325			滇粳优1号
	滇粳优1号	ITA325			滇粳优1号
	滇粳优1号	ITA325			滇粳优1号
	滇粳优1号	ITA325			滇粳优1号
	滇粳优1号	ITA325			滇粳优1号
	滇粳优1号	ITA325			滇粳优1号
	滇粳优1号	IR55423-01			滇粳优1号
	滇粳优1号	IR55423-01			滇粳优1号
	滇粳优1号	IR55423-01			滇粳优1号
	滇粳优1号	IR55423-01			滇粳优1号
	滇粳优1号	IR55423-01			滇粳优1号
	滇粳优1号	Dourado Precoce			滇粳优1号
	滇粳优1号	Dourado Precoce			滇粳优1号
	滇粳优1号	Dourado Precoce			滇粳优1号
	滇粳优1号	Dourado Precoce			滇粳优1号
	滇粳优1号	Dourado Precoce			滇粳优1号
	滇粳优1号	Dourado Precoce			滇粳优1号
	滇粳优1号	Dourado Precoce			滇粳优1号
	滇粳优1号	Dourado Precoce			滇粳优1号
	滇粳优1号	Dourado Precoce			滇粳优1号
	滇粳优1号	Dourado Precoce			滇粳优1号
	滇粳优1号	Dourado Precoce			滇粳优1号
	滇粳优1号	Dourado Precoce			滇粳优1号
	滇粳优1号	Moroberekan			滇粳优1号
	滇粳优1号	Moroberekan			滇粳优1号
	滇粳优1号	Moroberekan			滇粳优1号
	滇粳优1号	Moroberekan			滇粳优1号
	滇粳优1号	Moroberekan			滇粳优1号
	滇粳优1号	IR55423-01			滇粳优1号
	滇粳优1号	IR55423-01			滇粳优1号
	滇粳优1号	IR55423-01			滇粳优1号
	滇粳优1号	IR55423-01			滇粳优1号
	滇粳优1号	IR55423-01			滇粳优1号
	滇粳优1号	IR55423-01			滇粳优1号
	滇粳优1号	IR55423-01			滇粳优1号
	滇粳优1号	草皮谷			滇粳优1号
	滇粳优1号	IR55423-01			滇粳优1号
	滇粳优1号	IR55423-01			滇粳优1号
	滇粳优1号	IR55423-01			滇粳优1号
	滇粳优1号	IR55423-01			滇粳优1号
	滇粳优1号	云陆55			滇粳优1号
	滇粳优1号	云陆89			滇粳优1号
	滇粳优1号	云陆89			滇粳优1号
	滇粳优1号	IAC1246			滇粳优1号
	滇粳优1号	AZUCENA			滇粳优1号
	滇粳优1号	AZUCENA			滇粳优1号
	滇粳优1号	考糯亮			滇粳优1号
	滇粳优1号	考糯亮			滇粳优1号
	滇粳优1号	Moroberekan			滇粳优1号
	滇粳优1号	B6144F-MR-6			滇粳优1号
	滇粳优1号	B6144F-MR-6			滇粳优1号
	滇粳优1号	云陆59			滇粳优1号
	滇粳优1号	BR21			滇粳优1号
	滇粳优1号	Moroberekan			滇粳优1号
	滇粳优1号	IAC25			滇粳优1号
	滇粳优1号	IAC25			滇粳优1号
	滇粳优1号	IAC25			滇粳优1号
	滇粳优1号	IAC25			滇粳优1号
	滇粳优1号	大白谷			滇粳优1号
	滇粳优1号	ITA325			滇粳优1号
	滇粳优1号	ITA325			滇粳优1号
	滇粳优1号	ITA325			滇粳优1号
	滇粳优1号	ITA325			滇粳优1号
	滇粳优1号	ITA325			滇粳优1号
	滇粳优1号	IR55423-01			滇粳优1号
	滇粳优1号	IR55423-01			滇粳优1号
	滇粳优1号	IR55423-01			滇粳优1号
	滇粳优1号	WAB56-50			滇粳优1号
	滇粳优1号	WAB56-50			滇粳优1号
	滇粳优1号	WAB56-50			滇粳优1号
	滇粳优1号	WAB56-50			滇粳优1号
	滇粳优1号	WAB56-50			滇粳优1号
	滇粳优1号	云陆5			滇粳优1号
	滇粳优1号	云陆5			滇粳优1号
	滇粳优1号	云陆5			滇粳优1号
	滇粳优1号	云陆5			滇粳优1号
	滇粳优1号	云陆28			滇粳优1号
	滇粳优1号	云陆28			滇粳优1号
	滇粳优1号	云陆28			滇粳优1号
	滇粳优1号	云陆28			滇粳优1号
	滇粳优1号	云陆29			滇粳优1号
	滇粳优1号	云陆29			滇粳优1号
	滇粳优1号	云陆56			滇粳优1号
	滇粳优1号	云陆56			滇粳优1号
	滇粳优1号	云陆56			滇粳优1号
	滇粳优1号	云陆56			滇粳优1号
	滇粳优1号	云陆56			滇粳优1号
	滇粳优1号	云陆59			滇粳优1号
	滇粳优1号	云陆59			滇粳优1号
	滇粳优1号	云陆63			滇粳优1号
	滇粳优1号	云陆64			滇粳优1号
	滇粳优1号	云陆64			滇粳优1号
	滇粳优1号	云陆64			滇粳优1号
	滇粳优1号	云陆64			滇粳优1号
	滇粳优1号	云陆64			滇粳优1号
	滇粳优1号	云陆64			滇粳优1号
	滇粳优1号	云陆64			滇粳优1号
	滇粳优1号	云陆65			滇粳优1号
	滇粳优1号	云陆71			滇粳优1号
	滇粳优1号	云陆71			滇粳优1号
	滇粳优1号	云陆71			滇粳优1号
	滇粳优1号	云陆71			滇粳优1号
	滇粳优1号	云陆71			滇粳优1号
	滇粳优1号	云陆87			滇粳优1号
	滇粳优1号	云陆87			滇粳优1号
	滇粳优1号	云陆87			滇粳优1号
	滇粳优1号	云陆87			滇粳优1号
	滇粳优1号	云陆87			滇粳优1号
	滇粳优1号	云陆88			滇粳优1号
	滇粳优1号	云陆88			滇粳优1号
	滇粳优1号	云陆89			滇粳优1号
	滇粳优1号	云陆89			滇粳优1号
	滇粳优1号	云陆89			滇粳优1号
	滇粳优1号	云陆89			滇粳优1号
	滇粳优1号	云陆91			滇粳优1号
	滇粳优1号	云陆91			滇粳优1号
	滇粳优1号	云陆91			滇粳优1号
	滇粳优1号	云陆91			滇粳优1号
	滇粳优1号	云陆97			滇粳优1号
	滇粳优1号	云陆97			滇粳优1号
	滇粳优1号	云陆97			滇粳优1号
	滇粳优1号	云陆97			滇粳优1号
	滇粳优1号	云陆97			滇粳优1号
	滇粳优1号	云陆97			滇粳优1号
	滇粳优1号	云陆97			滇粳优1号
	滇粳优1号	云陆97			滇粳优1号
	滇粳优1号	云陆97			滇粳优1号
	滇粳优1号	云陆97			滇粳优1号
	滇粳优1号	云陆97			滇粳优1号
	滇粳优1号	云陆98			滇粳优1号
	滇粳优1号	云陆98			滇粳优1号
	滇粳优1号	云陆98			滇粳优1号
	滇粳优1号	云陆98			滇粳优1号
	滇粳优1号	云陆98			滇粳优1号
	滇粳优1号	Dourado Precoce			滇粳优1号
	滇粳优1号	Dourado Precoce			滇粳优1号
	滇粳优1号	Dourado Precoce			滇粳优1号
	滇粳优1号	Dourado Precoce			滇粳优1号
	滇粳优1号	Dourado Precoce			滇粳优1号
	滇粳优1号	IAC1246			滇粳优1号
	滇粳优1号	IAC25			滇粳优1号
	滇粳优1号	IAC25			滇粳优1号
	滇粳优1号	IAC25			滇粳优1号
	滇粳优1号	IAC25			滇粳优1号
	滇粳优1号	CIRAD 411			滇粳优1号
	滇粳优1号	UPL RI-5			滇粳优1号
	滇粳优1号	凤庆尖嘴谷			滇粳优1号
	滇粳优1号	考糯亮			滇粳优1号
	滇粳优1号	三粒寸			滇粳优1号
	滇粳优1号	三粒寸			滇粳优1号
	滇粳优1号	三粒寸			滇粳优1号
	滇粳优1号	三粒寸			滇粳优1号
	滇粳优1号	安顺旱谷			滇粳优1号
	滇粳优1号	册亨光壳糯			滇粳优1号
	滇粳优1号	德江狗点头			滇粳优1号
	滇粳优1号	黄樱桃糯			滇粳优1号
	滇粳优1号	黄樱桃糯			滇粳优1号
	滇粳优1号	黄樱桃糯			滇粳优1号
	滇粳优1号	黄樱桃糯			滇粳优1号
	滇粳优1号	晴隆黄糯			滇粳优1号
	滇粳优1号	小黄红米粘			滇粳优1号
	滇粳优1号	油粳稻			滇粳优1号
	滇粳优1号	油粳稻			滇粳优1号
	滇粳优1号	油粳稻			滇粳优1号
	滇粳优1号	油粳稻			滇粳优1号
	滇粳优1号	地谷糯			滇粳优1号
	滇粳优1号	地谷糯			滇粳优1号
	滇粳优1号	地谷糯			滇粳优1号
	滇粳优1号	黄皮谷			滇粳优1号
	滇粳优1号	黄皮谷			滇粳优1号
	滇粳优1号	花壳糯			滇粳优1号
	滇粳优1号	勐提谷			滇粳优1号
	滇粳优1号	勐提谷			滇粳优1号
	滇粳优1号	矮红谷			滇粳优1号
	滇粳优1号	矮红谷			滇粳优1号
	滇粳优1号	矮红谷			滇粳优1号
	滇粳优1号	毫好早			滇粳优1号
	滇粳优1号	毫好早			滇粳优1号
	滇粳优1号	毫好早			滇粳优1号
	滇粳优1号	毫勐龙			滇粳优1号
	滇粳优1号	毫勐龙			滇粳优1号
	滇粳优1号	毫勐囡			滇粳优1号
	滇粳优1号	毫勐囡			滇粳优1号
	滇粳优1号	BR21			滇粳优1号
	滇粳优1号	BR21			滇粳优1号
	滇粳优1号	BR21			滇粳优1号
	滇粳优1号	BR21			滇粳优1号
	滇粳优1号	BR21			滇粳优1号
	滇粳优1号	BR21			滇粳优1号
	滇粳优1号	BR21			滇粳优1号
	滇粳优1号	BR21			滇粳优1号
	滇粳优1号	扎罗戈			滇粳优1号
	滇粳优1号	扎罗戈			滇粳优1号
	滇粳优1号	扎罗戈			滇粳优1号
	滇粳优1号	扎罗戈			滇粳优1号
	滇粳优1号	扎罗戈			滇粳优1号
	滇粳优1号	扎罗戈			滇粳优1号
	滇粳优1号	草皮谷			滇粳优1号
	滇粳优1号	草皮谷			滇粳优1号
	滇粳优1号	草皮谷			滇粳优1号
	滇粳优1号	草皮谷			滇粳优1号
	滇粳优1号	草皮谷			滇粳优1号
	滇粳优1号	草皮谷			滇粳优1号
	滇粳优1号	草皮谷			滇粳优1号
	滇粳优1号	草皮谷			滇粳优1号
	滇粳优1号	草皮谷			滇粳优1号
	滇粳优1号	草皮谷			滇粳优1号
	滇粳优1号	OS6			滇粳优1号
	滇粳优1号	OS6			滇粳优1号
	滇粳优1号	OS6			滇粳优1号
	滇粳优1号	OS6			滇粳优1号
	滇粳优1号	Dular			滇粳优1号
	滇粳优1号	Dular			滇粳优1号
	滇粳优1号	Dular			滇粳优1号
	滇粳优1号	B6144F-MR-6			滇粳优1号
	滇粳优1号	B6144F-MR-6			滇粳优1号
	滇粳优1号	B6144F-MR-6			滇粳优1号
	滇粳优1号	B6144F-MR-6			滇粳优1号
	滇粳优1号	B6144F-MR-6			滇粳优1号
	滇粳优1号	B6144F-MR-6			滇粳优1号
	滇粳优1号	B6144F-MR-6			滇粳优1号
	滇粳优1号	B6144F-MR-6			滇粳优1号
	滇粳优1号	B6144F-MR-6			滇粳优1号
	滇粳优1号	B6144F-MR-6			滇粳优1号
	滇粳优1号	B6144F-MR-6			滇粳优1号
	滇粳优1号	B6144F-MR-6			滇粳优1号
	滇粳优1号	沧源旱紫糯			滇粳优1号
	滇粳优1号	沧源旱紫糯			滇粳优1号
	滇粳优1号	大灰谷			滇粳优1号
	滇粳优1号	云陆65			滇粳优1号
	滇粳优1号	小白谷			滇粳优1号
	滇粳优1号	IAC1246			滇粳优1号
	滇粳优1号	IAC1246			滇粳优1号
	滇粳优1号	IAC25			滇粳优1号
	滇粳优1号	IAC25			滇粳优1号
	滇粳优1号	IAC25			滇粳优1号
	滇粳优1号	IAC25			滇粳优1号
	滇粳优1号	抬头谷			滇粳优1号
	滇粳优1号	Moroberekan			滇粳优1号
	滇粳优1号	Moroberekan			滇粳优1号
	滇粳优1号	IR55423-01			滇粳优1号
	滇粳优1号	IAC25			滇粳优1号
	滇粳优1号	IAC25			滇粳优1号
	滇粳优1号	IAC25			滇粳优1号
	滇粳优1号	IAC25			滇粳优1号
	滇粳优1号	IAC25			滇粳优1号
	滇粳优1号	IAC25			滇粳优1号
	滇粳优1号	路南旱谷			滇粳优1号
	滇粳优1号	路南旱谷			滇粳优1号
	滇粳优1号	路南旱谷			滇粳优1号
	滇粳优1号	勐曼白谷			滇粳优1号
	滇粳优1号	油粳稻			滇粳优1号
	滇粳优1号	IRAT104			滇粳优1号
	滇粳优1号	IRAT104			滇粳优1号
	滇粳优1号	IRAT104			滇粳优1号
